# Supplementary material for: Clustering of Cardiac Transcriptome Profiles Reveals Unique: Subgroups of Dilated Cardiomyopathy Patients
Source: PubMed Central journal article supplement — JACC Basic Transl Sci. 2023 Feb 1;8(4):406–18. doi: 10.1016/j.jacbts.2022.10.010 (PMC10149655; doi:10.1016/j.jacbts.2022.10.010), 2023-02-01
Supplement: mmc1.pdf [file mmc1.pdf]

**Supplemental Table 1. Significant differentially expressed genes per cluster.** The number of differentially expressed genes per (super-)cluster with adjusted p-value <0.05, fold change >1.5 or <1/1.5, and mean expression >200

| Cluster             | C1 (N=15)   | C2 (N=11)  | C3 (N=18)  | C4 (N=38)  | C1-2 vs C3-4 |
|---------------------|-------------|------------|------------|------------|--------------|
| Transcript          | 6024        | 782        | 266        | 1111       | 3935         |
| <b>unique genes</b> | <b>2404</b> | <b>409</b> | <b>107</b> | <b>593</b> | <b>1738</b>  |
| up-regulated        | 1044        | 34         | 29         | 509        | 533          |
| down-regulated      | 1360        | 375        | 78         | 84         | 1205         |

**Supplemental Table 2. Clinical variables per cluster.** Clinical variables among clusters were compared using the chi-square or Kruskal-Wallis test. Variables with a *P* value <0.10 are included in Figure 4.

|                                          | Cluster 1              | Cluster 2              | Cluster 3              | Cluster 4              | p-value |
|------------------------------------------|------------------------|------------------------|------------------------|------------------------|---------|
| <i>Age, year</i>                         | 56.13 ± 13.15          | 57.45 ± 11.67          | 58.50 ± 8.12           | 53.08 ± 12.78          | 0.41    |
| <i>Time from diagnosis, month</i>        | 1.9 [1.2-5.3]          | 4.2 [1.5-5.4]          | 2 [0.5-7]              | 2.6 [1.1-7.3]          | 0.98    |
| <i>Female, n (%)</i>                     | 3 ( 20.00 )            | 1 ( 9.09 )             | 4 ( 22.22 )            | 14 ( 36.84 )           | 0.24    |
| <i>Diabetes mellitus, n (%)</i>          | 0 ( 0.00 )             | 1 ( 9.09 )             | 2 ( 11.11 )            | 6 ( 15.79 )            | 0.43    |
| <i>Heart rate, b.p.m.</i>                | 70.00 [65.50-83.00]    | 76.00 [66.00-81.50]    | 73.00 [66.00-78.75]    | 72.50 [62.25-82.00]    | 0.97    |
| <i>Systolic blood pressure, mm Hg</i>    | 124.00 [113.50-139.00] | 146.00 [129.50-155.00] | 135.50 [130.00-139.50] | 126.00 [120.00-140.00] | 0.13    |
| <i>Diastolic blood pressure, mm Hg</i>   | 78.20 ± 12.14          | 85.00 ± 14.83          | 83.00 ± 9.06           | 77.37 ± 11.66          | 0.14    |
| <i>NYHA functional class ≥III, n (%)</i> | 10 ( 66.67 )           | 0 ( 0.00 )             | 7 ( 38.89 )            | 14 ( 36.84 )           | 0.007   |
| <i>Hypertension, n (%)</i>               | 5 ( 33.33 )            | 3 ( 27.27 )            | 8 ( 44.44 )            | 14 ( 36.84 )           | 0.81    |
| <i>Body mass index, kg/m<sup>2</sup></i> | 26.73 ± 3.82           | 27.44 ± 4.32           | 26.55 ± 4.19           | 27.64 ± 5.08           | 0.34    |
| <b><i>Disease modifiers, n (%)</i></b>   |                        |                        |                        |                        |         |
| <i>Genetic mutation</i>                  | 12 ( 80.00 )           | 5 ( 45.45 )            | 9 ( 50.00 )            | 15 ( 39.47 )           | 0.067   |
| <i>Genetic group</i>                     |                        | \                      | ]                      | ]                      | 0.003   |
| <i>LMNA</i>                              | 1 (6.67)               | 1 (9.09)               | 0 (0.00)               | 5 (13.16)              |         |
| <i>TTNtv</i>                             | 10 (66.67)             | 4 (36.36)              | 5 (27.78)              | 6 (15.79)              |         |
| <i>Other genetic</i>                     | 1 (6.67)               | 0 (0.00)               | 4 (22.22)              | 4 (10.53)              |         |
| <i>Gene-elusive</i>                      | 3 (20.00)              | 6 (54.54)              | 9 (50.00)              | 23 (60.52)             |         |
| <i>Familial disease</i>                  | 9 ( 60.00 )            | 3 ( 27.27 )            | 5 ( 27.78 )            | 9 ( 23.68 )            | 0.075   |
| <i>Toxic trigger</i>                     | 2 ( 13.33 )            | 1 ( 9.09 )             | 1 ( 5.56 )             | 4 ( 10.53 )            | 0.89    |
| <i>Auto-immune disease</i>               | 1 ( 6.67 )             | 1 ( 9.09 )             | 1 ( 5.56 )             | 2 ( 5.26 )             | 0.97    |
| <i>Cardiac inflammation</i>              | 4 ( 26.67 )            | 2 ( 18.18 )            | 4 ( 22.22 )            | 13 ( 34.21 )           | 0.67    |
| <i>Significant viral load</i>            | 2 ( 13.33 )            | 1 ( 9.09 )             | 4 ( 22.22 )            | 6 ( 15.79 )            | 0.80    |
| <i>Electrical trigger</i>                | 3 ( 20.00 )            | 4 ( 36.36 )            | 10 ( 55.56 )           | 16 ( 42.11 )           | 0.22    |
| <b><i>Echocardiography</i></b>           |                        |                        |                        |                        |         |
| <i>LV ejection fraction, %</i>           | 24.00 [47.50-65.50]    | 26.00 [21.00-36.50]    | 30.00 [21.00-31.75]    | 26.00 [22.25-35.75]    | 0.91    |
| <i>LV EDD index, mm/m<sup>2</sup></i>    | 31.91 [30.83-33.51]    | 30.41 [28.38-33.50]    | 31.04 [27.80-34.25]    | 30.59 [27.77-33.47]    | 0.68    |
| <i>LV ESD, mm</i>                        | 53.20 ± 7.36           | 54.74 ± 8.17           | 52.06 ± 9.13           | 52.40 ± 9.73           | 0.79    |
| <i>LA volume index, mL/m<sup>2</sup></i> | 55.08 [43.95-63.75]    | 52.00 [41.47-57.91]    | 41.19 [37.68-44.20]    | 44.01 [36.45-54.77]    | 0.10    |
| <i>LV mass index, g/m<sup>2</sup></i>    | 111.87 [99.90-120.89]  | 118.18 [102.71-133.56] | 117.49 [102.91-125.23] | 112.79 [94.69-133.38]  | 0.94    |
| <i>E/e' ratio</i>                        | 11.10 [9.75-13.41]     | 10.60 [8.32-11.50]     | 9.36 [8.47-10.89]      | 10.50 [9.01-12.23]     | 0.17    |
| <i>Posterior WT, mm</i>                  | 9.00 [8.00-9.50]       | 9.00 [8.50-10.50]      | 9.00 [8.22-9.95]       | 9.00 [8.00-10.00]      | 0.90    |
| <i>Intraventricular ST, mm</i>           | 8.40 [8.00-9.00]       | 9.00 [8.00-10.03]      | 9.00 [8.00-9.22]       | 9.05 [8.02-10.00]      | 0.18    |
| <b><i>Laboratory data</i></b>            |                        |                        |                        |                        |         |
| <i>NT-proBNP, pmol/L</i>                 | 142.00 [26.65-389.00]  | 90.10 [25.57-185.00]   | 11.05 [7.22-61.02]     | 108.00 [17.57-335.00]  | 0.055   |

|                                                                                                                                                                                                           |                        |                        |                        |                        |       |
|-----------------------------------------------------------------------------------------------------------------------------------------------------------------------------------------------------------|------------------------|------------------------|------------------------|------------------------|-------|
| <i>Hs-Troponin T, ng/L</i>                                                                                                                                                                                | 16.00 [11.50-23.00]    | 12.75 [9.21-18.00]     | 13.18 [9.25-22.00]     | 13.21 [8.00-27.74]     | 0.84  |
| <i>Creatinine, μmol/L</i>                                                                                                                                                                                 | 102.00 [90.00-116.50]  | 99.00 [80.50-111.00]   | 104.00 [84.25-113.25]  | 99.50 [86.75-134.25]   | 0.96  |
| <i>sIL-2R elevation, n (%)</i>                                                                                                                                                                            | 3 ( 20.00 )            | 2 ( 18.18 )            | 6 ( 33.33 )            | 6 ( 15.79 )            | 0.50  |
| <i>Neopterin elevation, n (%)</i>                                                                                                                                                                         | 8 ( 53.33 )            | 2 ( 18.18 )            | 4 ( 22.22 )            | 14 ( 36.84 )           | 0.17  |
| <i>Cardiac auto-antibodies, n (%)</i>                                                                                                                                                                     | 1 ( 6.67 )             | 0 ( 0.00 )             | 0 ( 0.00 )             | 1 ( 2.63 )             | 0.60  |
| <i>C-reactive protein, mg/L</i>                                                                                                                                                                           | 2.00 [1.71-7.50]       | 3.00 [1.00-7.50]       | 2.13 [1.77-4.60]       | 3.00 [1.50-5.51]       | 0.98  |
| <i>ASAT, U/L</i>                                                                                                                                                                                          | 28.00 [25.50-37.50]    | 24.00 [20.00-27.50]    | 23.00 [20.25-36.25]    | 25.50 [20.72-29.50]    | 0.19  |
| <i>ALAT, U/L</i>                                                                                                                                                                                          | 32.00 [23.50-39.00]    | 29.00 [22.50-36.14]    | 30.50 [20.25-45.00]    | 24.80 [19.25-31.57]    | 0.54  |
| <b><i>ECG/Holter, n (%)</i></b>                                                                                                                                                                           |                        |                        |                        |                        |       |
| <i>Atrial fibrillation</i>                                                                                                                                                                                | 7 ( 46.67 )            | 3 ( 27.27 )            | 5 ( 27.78 )            | 11 ( 28.95 )           | 0.59  |
| <i>Non-sustained VT</i>                                                                                                                                                                                   | 6 ( 40.00 )            | 3 ( 27.27 )            | 8 ( 44.44 )            | 15 ( 39.47 )           | 0.83  |
| <i>Atrioventricular block</i>                                                                                                                                                                             | 3 ( 20.00 )            | 0 ( 0.00 )             | 2 ( 11.11 )            | 5 ( 13.16 )            | 0.49  |
| <i>Left bundle branch block</i>                                                                                                                                                                           | 3 ( 20.00 )            | 3 ( 27.27 )            | 10 ( 55.56 )           | 14 ( 36.84 )           | 0.17  |
| <i>Out of hospital cardiac arrest</i>                                                                                                                                                                     | 1 ( 6.67 )             | 0 ( 0.00 )             | 3 ( 16.67 )            | 3 ( 7.89 )             | 0.45  |
| <b><i>Cardiovascular MR</i></b>                                                                                                                                                                           |                        |                        |                        |                        |       |
| <i>LV mass index, g/m<sup>2</sup></i>                                                                                                                                                                     | 57.45 [48.83-71.80]    | 77.06 [66.00-87.70]    | 72.05 [56.17-84.54]    | 72.65 [60.46-88.06]    | 0.041 |
| <i>LV EDV index, mL/m<sup>2</sup></i>                                                                                                                                                                     | 142.39 [120.26-156.12] | 117.77 [107.77-134.51] | 122.83 [115.71-156.72] | 122.88 [106.18-175.57] | 0.79  |
| <i>LV ESV index, mL/m<sup>2</sup></i>                                                                                                                                                                     | 101.58 [79.75-133.04]  | 83.81 [66.28-100.80]   | 92.70 [72.63-111.95]   | 79.10 [55.52-132.63]   | 0.78  |
| <i>LV stroke volume index, mL/m<sup>2</sup></i>                                                                                                                                                           | 34.26 [28.34-41.19]    | 41.26 [32.84-45.29]    | 42.12 [32.97-45.33]    | 41.05 [35.09-47.36]    | 0.09  |
| <i>LV ejection fraction, %</i>                                                                                                                                                                            | 29.00 [20.08-35.50]    | 28.00 [23.00-42.08]    | 29.08 [24.46-39.25]    | 35.58 [24.00-44.50]    | 0.33  |
| <i>Late gadolinium enhancement, n (%)</i>                                                                                                                                                                 | 11 ( 73.33 )           | 3 ( 27.27 )            | 8 ( 44.44 )            | 19 ( 50.00 )           | 0.12  |
| <b><i>Endomyocardial biopsy</i></b>                                                                                                                                                                       |                        |                        |                        |                        |       |
| <i>Collagen volume fraction, %/area</i>                                                                                                                                                                   | 4.69 [2.47-12.80]      | 3.37 [2.25-9.18]       | 6.10 [3.68-8.61]       | 6.81 [4.82-11.21]      | 0.44  |
| <b><i>Medication, n (%)</i></b>                                                                                                                                                                           |                        |                        |                        |                        |       |
| <i>Beta blocker</i>                                                                                                                                                                                       | 15 (100.00)            | 11 (100.00)            | 17 (94.44)             | 36 (94.74)             | 0.69  |
| <i>ACE inhibitor</i>                                                                                                                                                                                      | 12 (80.00)             | 9 (81.81)              | 11 (61.11)             | 27 (71.05)             | 0.56  |
| <i>Angiotensin II receptor blocker</i>                                                                                                                                                                    | 2 (13.33)              | 2 (18.18)              | 7 (38.89)              | 9 (23.68)              | 0.35  |
| <i>Mineralocorticoid receptor antagonist</i>                                                                                                                                                              | 12 (80.00)             | 8 (72.72)              | 13 (72.22)             | 23 (60.53)             | 0.53  |
| <i>Diuretics</i>                                                                                                                                                                                          | 11 (73.33)             | 7 (63.63)              | 11 (61.11)             | 24 (63.16)             | 0.89  |
| <i>Angiotensin receptor/neprilysin inhibitor</i>                                                                                                                                                          | 1 (6.67)               | 0 (0)                  | 0 (0.00)               | 2 (5.26)               | 0.62  |
| <b>FOOTNOTE:</b> Variables are presented using the mean ± standard deviation (SD) or median with 25th-75th percentiles [Q1-Q3] for continuous variables and count (percentage) for categorical variables. |                        |                        |                        |                        |       |

**Supplemental Table 3. Comparison between the early-stage and end-stage DCM cohort.** Seven clinical variables were measured in both cohorts of DCM patients.

|                                                                                                                                                                                                           | Early-stage DCM patients (MUMC) | End-stage DCM patients (MAGNet) | p-value |
|-----------------------------------------------------------------------------------------------------------------------------------------------------------------------------------------------------------|---------------------------------|---------------------------------|---------|
| Age, year                                                                                                                                                                                                 | 55.4 ± 11.9                     | 54.8 ± 7.1                      | 0.31    |
| Female, n (%)                                                                                                                                                                                             | 22 (27)                         | 30 (34)                         | 0.33    |
| Diabetes mellitus, n (%)                                                                                                                                                                                  | 9 (11)                          | 20 (23)                         | 0.065   |
| Hypertension, n (%)                                                                                                                                                                                       | 30 (37)                         | 39 (44)                         | 0.35    |
| Body mass index, kg/m <sup>2</sup>                                                                                                                                                                        | 27.2 ± 4.5                      | 26.5 ± 4.9                      | 0.18    |
| LV ejection fraction, %                                                                                                                                                                                   | 26 [21-35]                      | 15 [10-20]                      | <0.001  |
| Atrial fibrillation                                                                                                                                                                                       | 26 (32)                         | 44 (50)                         | 0.019   |
| <b>FOOTNOTE:</b> Variables are presented using the mean ± standard deviation (SD) or median with 25th-75th percentiles [Q1-Q3] for continuous variables and count (percentage) for categorical variables. |                                 |                                 |         |

**A.**

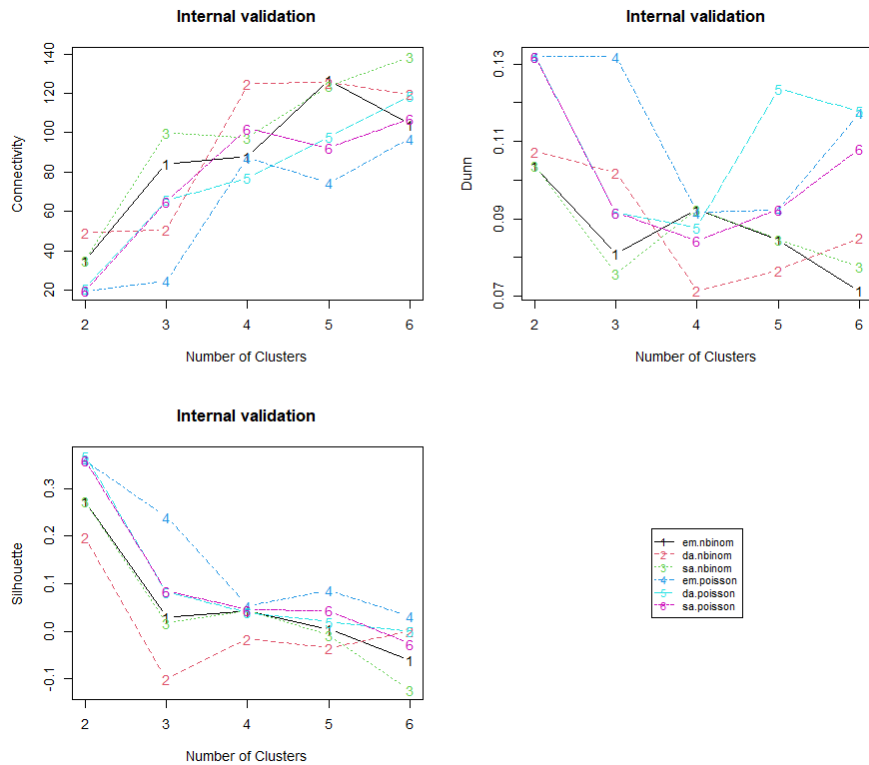

**B.**

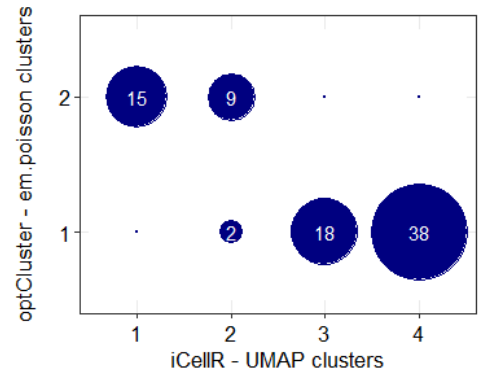

**Supplemental Figure 1. RNA-seq Clustering with optCluster methods. (A)** Internal validation metrics show poisson distribution with the expectation maximization algorithm (em.poisson, blue line marked --4-- ) for 2 clusters is the best among all 6 model-based clustering methods for RNA-seq data. **(B)** The partitioning of samples in clusters defined by dimensionality reduction combined with the graphic-based clustering based on UMAP (iCellR - UMAP) and clusters defined by best model-based clustering (optCluster - em.poisson). The super-cluster 1-2 and 3-4 are highly assembled with a Jaccard similarity coefficient =0.92.

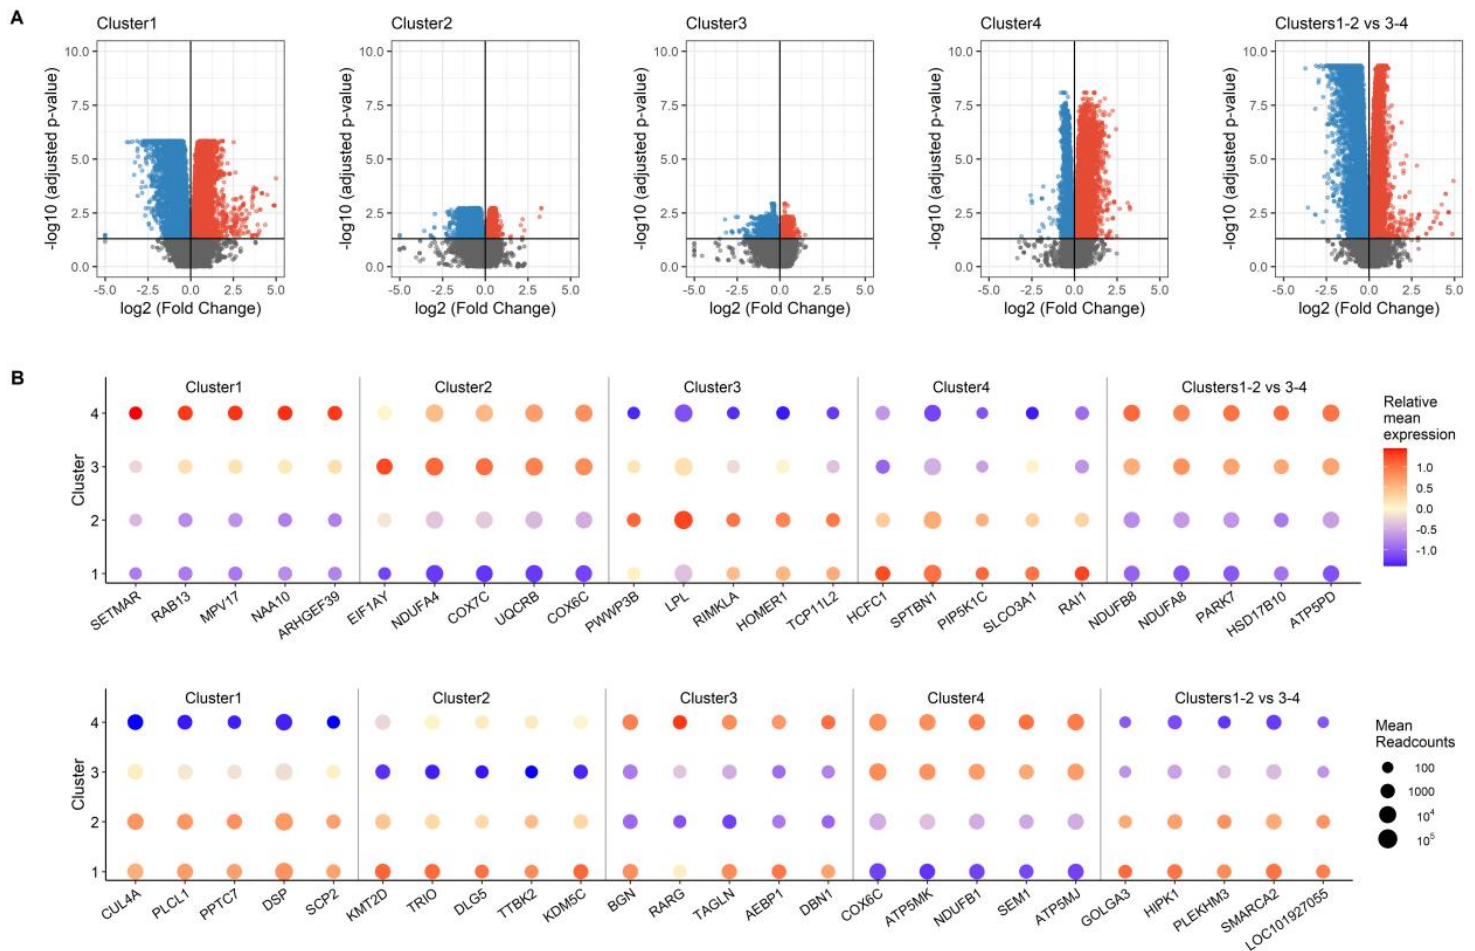

**Supplemental Figure 2. Differential expression analysis. (A)** Volcano plots of transcripts per cluster compared to the other three clusters, or inter-superclusters. Adjusted p-value  $< 0.05$  is plotted as a cutoff to distinguish transcripts. **(B)** The top5 most significant differentially expressed up- and down-regulated cluster marker genes, among genes with adjusted p-value  $< 0.05$ ,  $|FC| > 1.5$  and mean reads  $> 400$  in the higher expressed part.

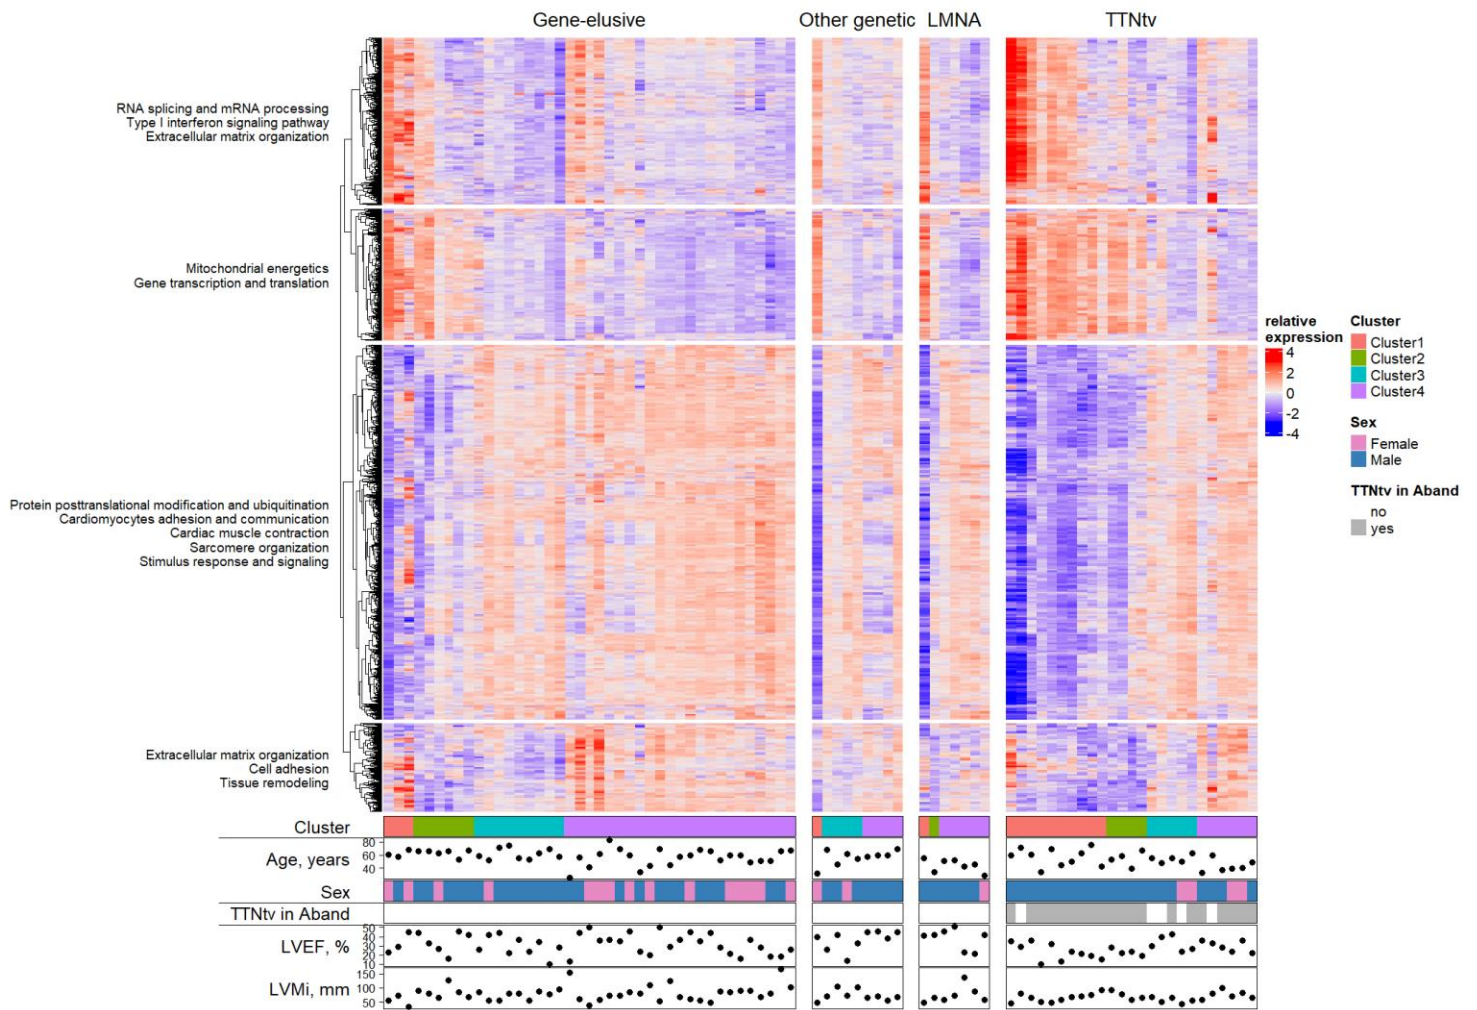

**Supplemental Figure 3. Heatmap of significant differentially expressed genes of clustering stratified per genotype. Heatmap combining genetic, clinical and transcriptomic information.**

**A**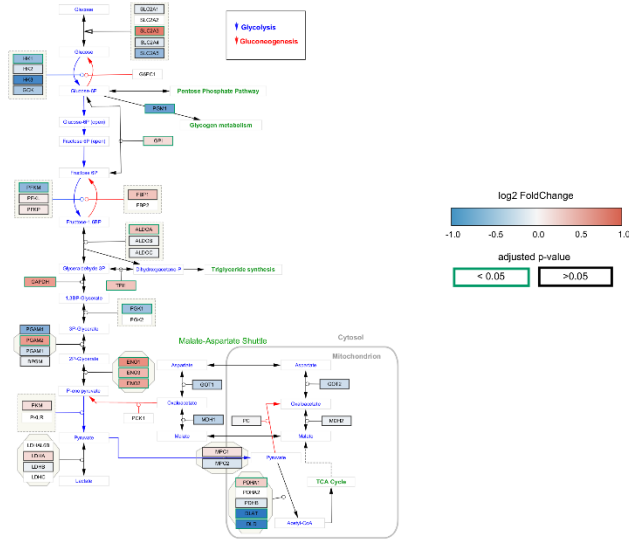**B**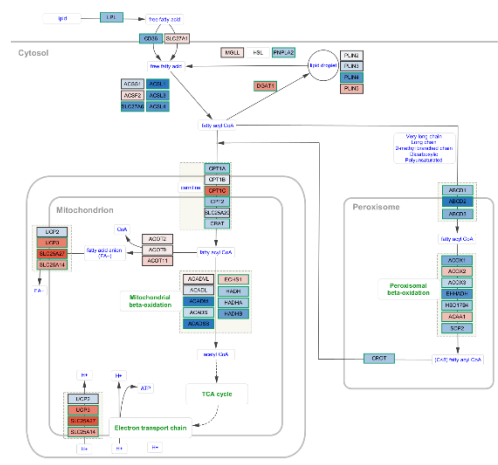**C**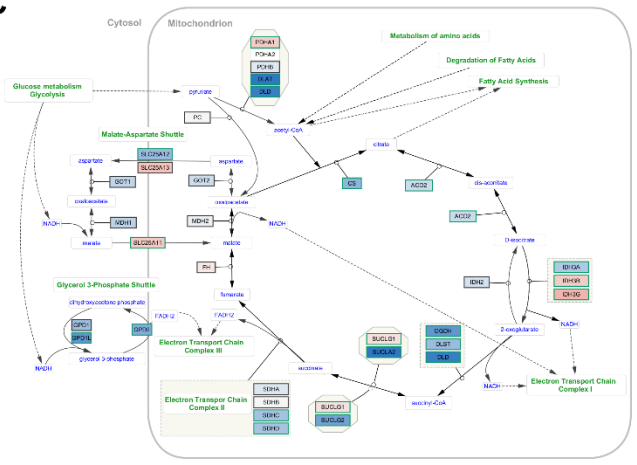**D**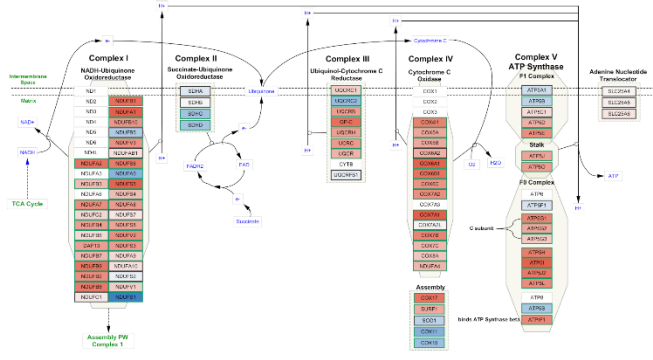

**Supplemental Figure 4. Transcriptomic expression of the substrate metabolism pathways in patients from cluster 1. (A)** glucose uptake and glycolysis pathway. **(B)** Fat uptake, storage and beta-oxidation. **(C)** Tricarboxylic cycle (TCA). **(D)** Electron transport chain, the oxidative phosphorylation system. Blue indicates a down-regulation of a gene, red indicates upregulation of a gene. The border of the Gene name, green: adjusted p-value <math>< 0.05</math>; black: adjusted p-value >math>> 0.05</math>; light grey: not expressed.



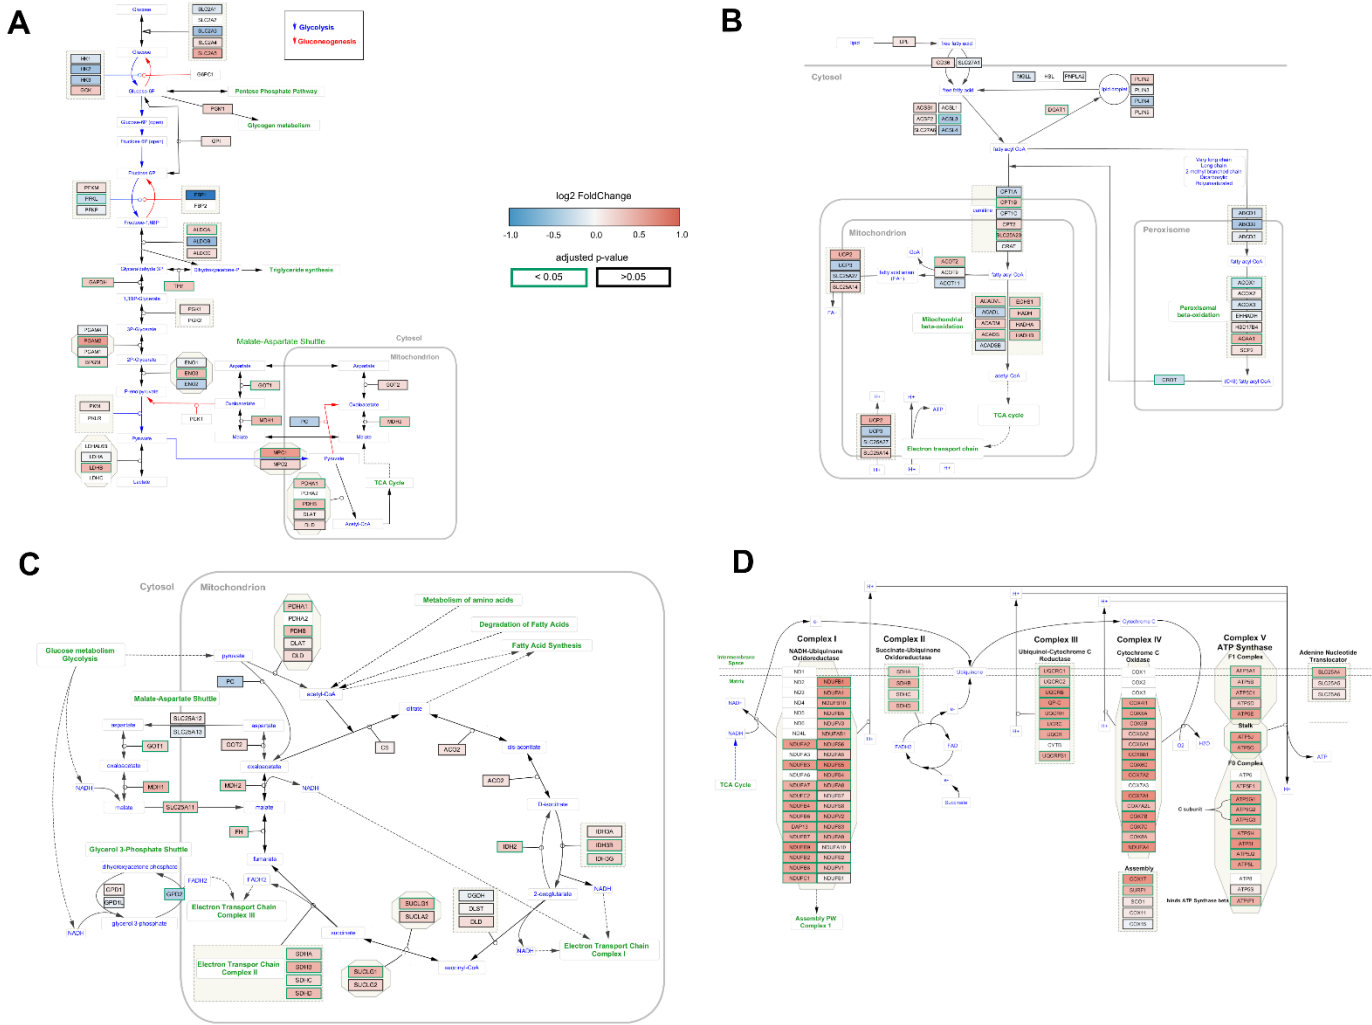

**Supplemental Figure 5. Transcriptomic expression of the substrate metabolism pathways in patients from cluster 2. (A) glucose uptake and glycolysis pathway. (B) Fat uptake, storage and beta-oxidation. (C) Tricarboxylic cycle (TCA). (D) Electron transport chain, the oxidative phosphorylation system. Blue indicates a down-regulation of a gene, red indicates upregulation of a gene. The border of the Gene name, green: adjusted p-value <0.05; black: adjusted p-value >0.05; light grey: not expressed.**

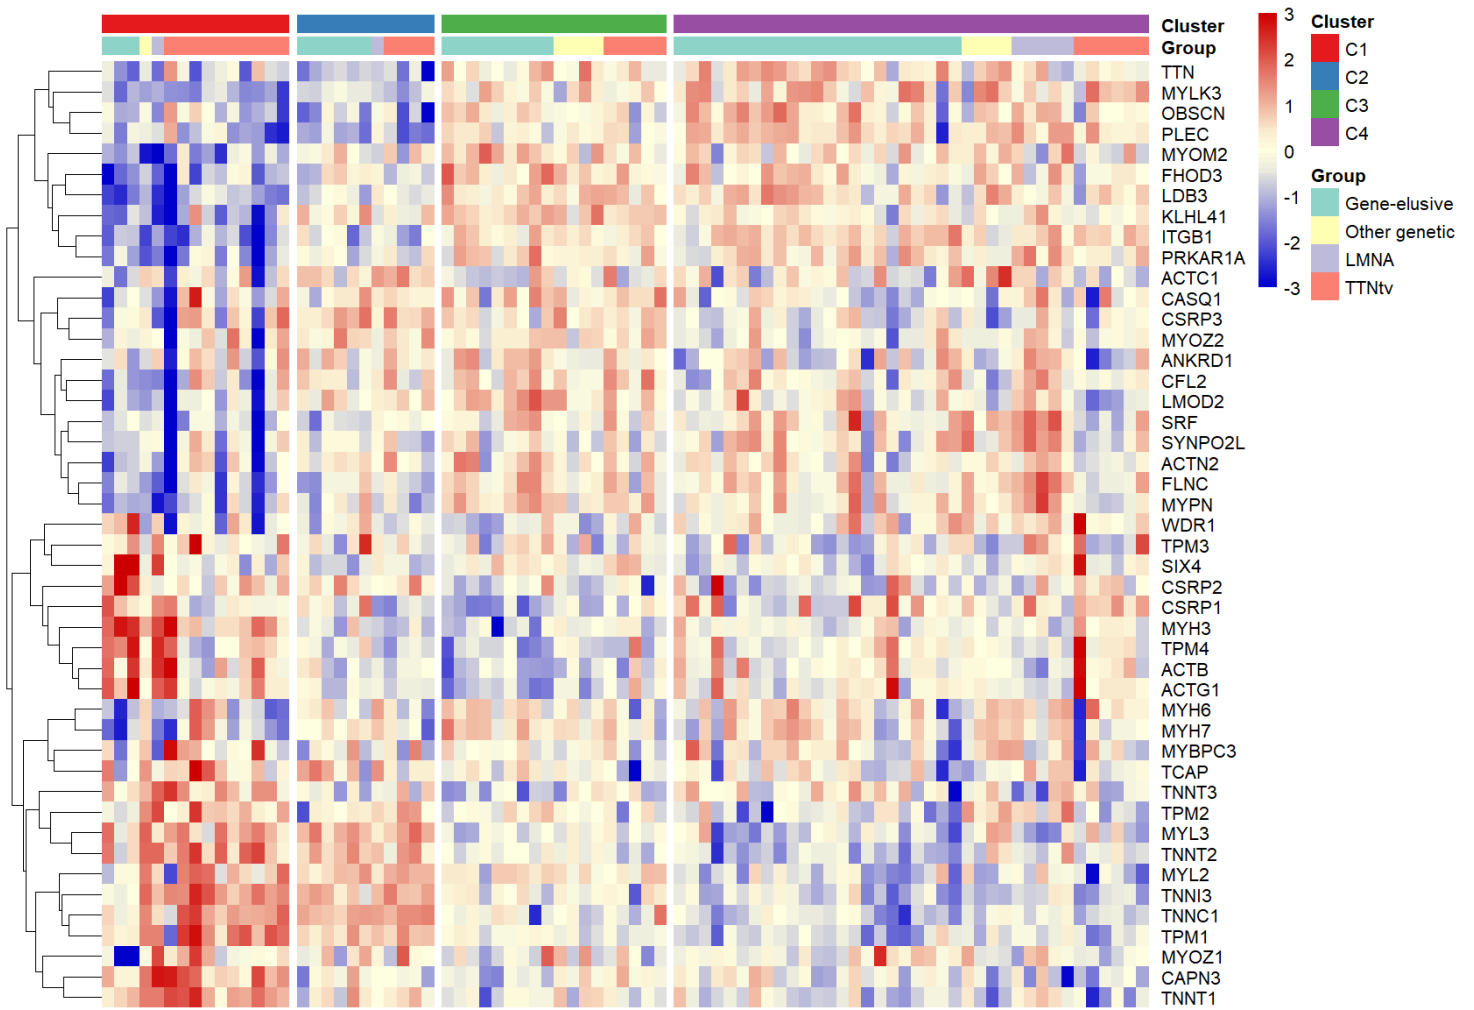

Supplemental Figure 6. Heatmap of the genes involved in sarcomere pathways divided per cluster and genotype.

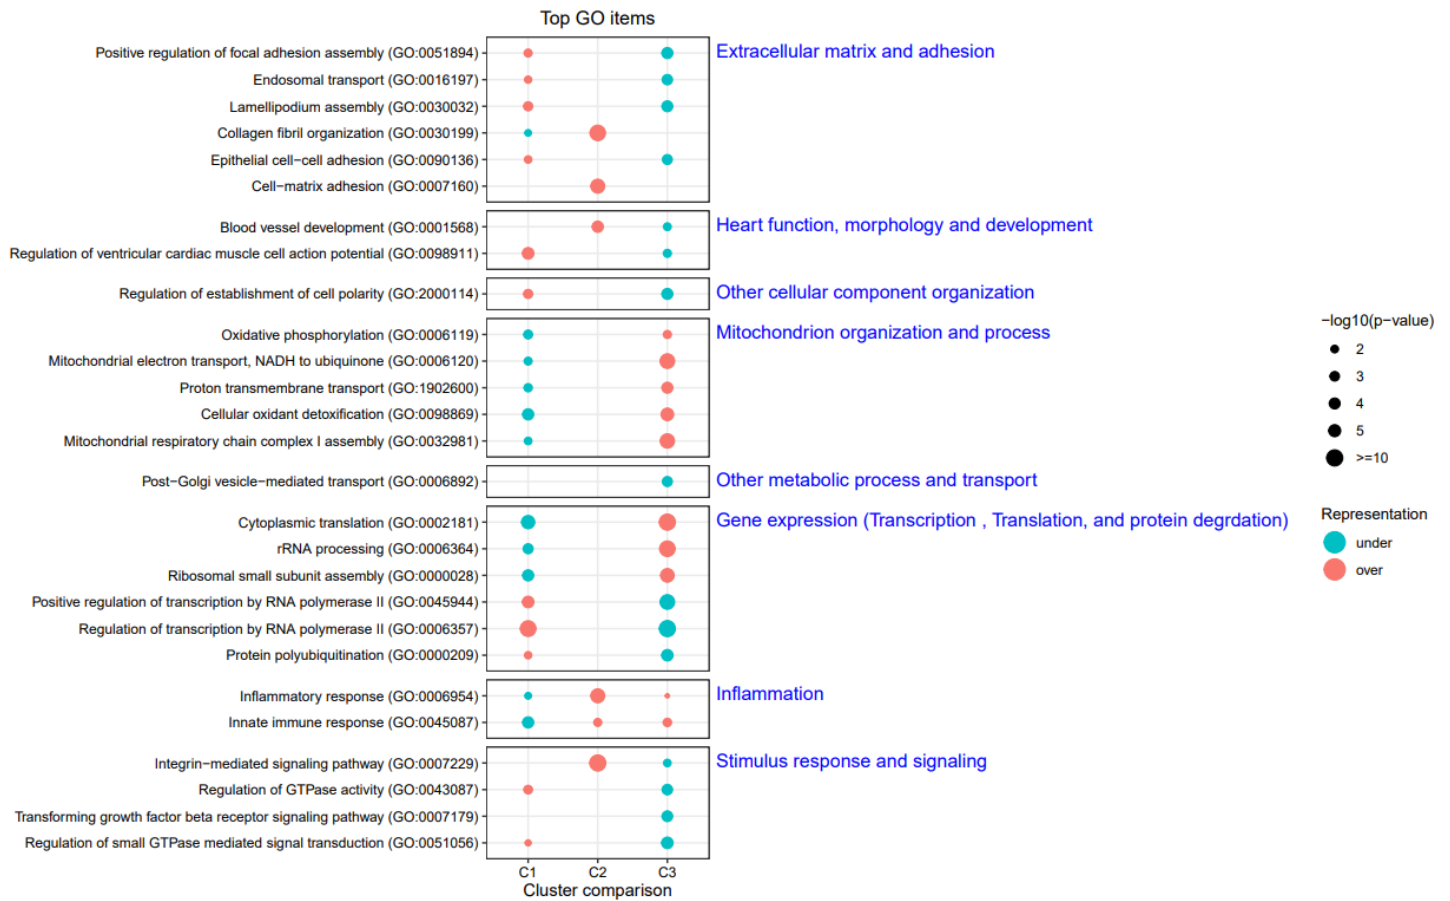

**Supplemental Figure 7. Top GO items of each cluster identified in the end-stage DCM patients grouped to biological functions. Results are displayed per cluster in comparison to the other clusters.**

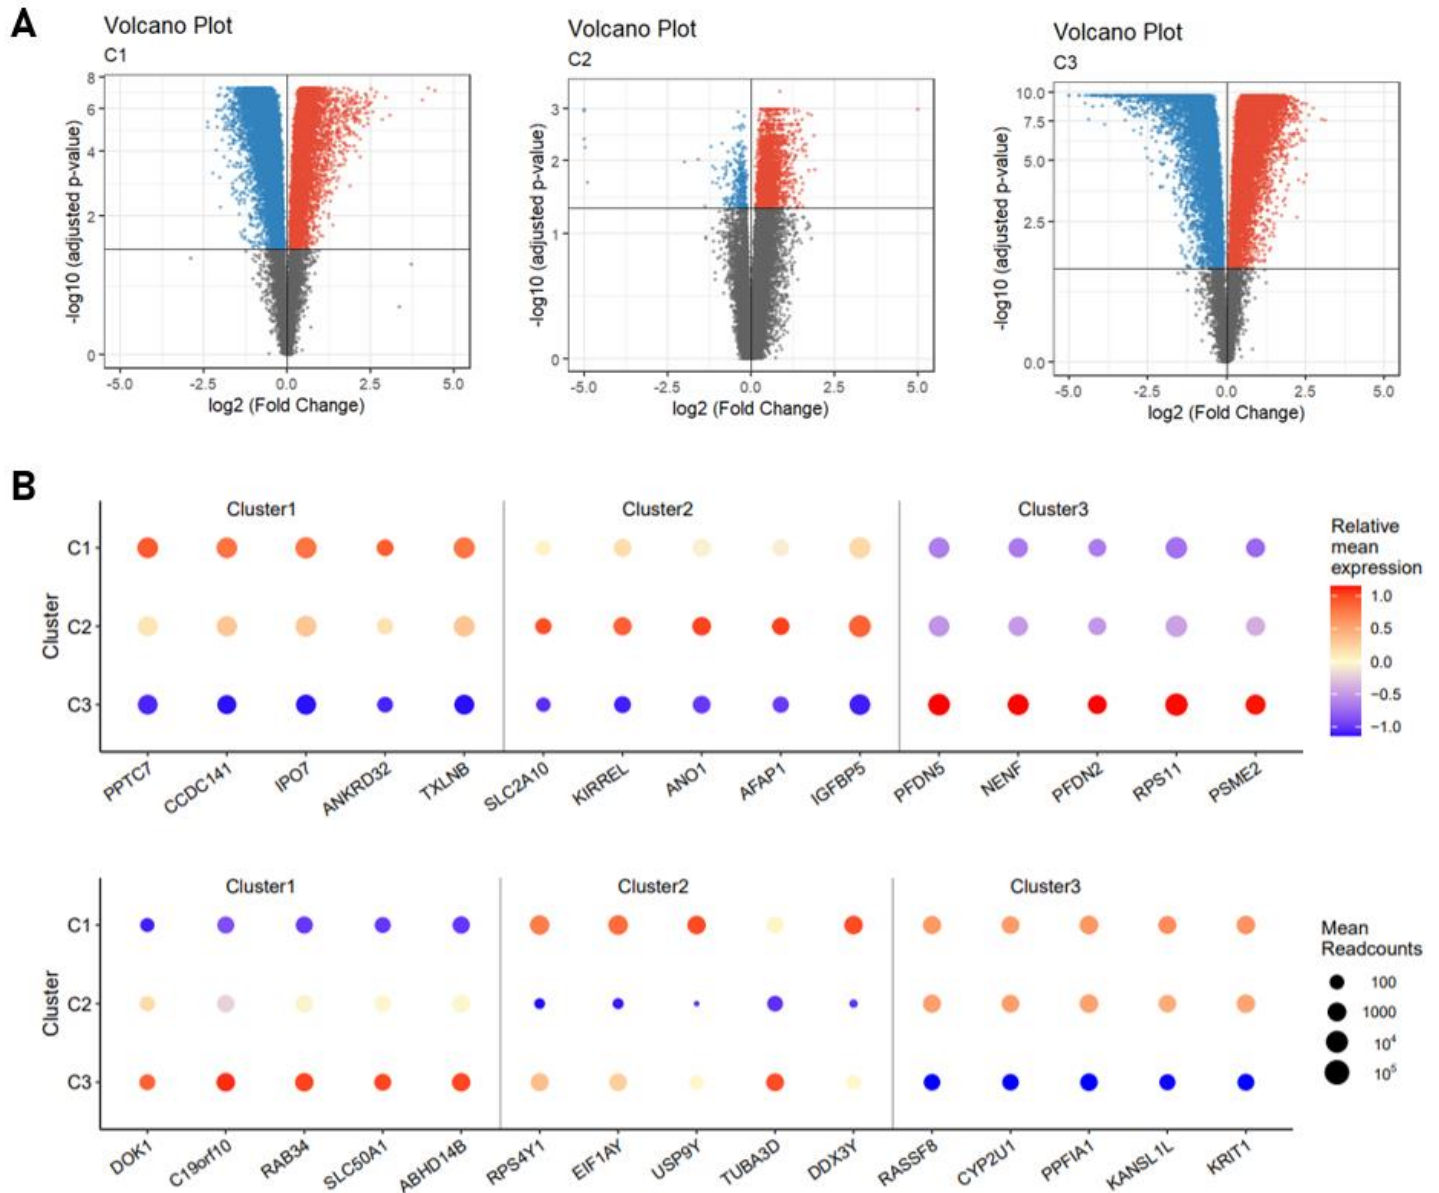

**Supplemental Figure 8. Differential expression analysis. (A)** Volcano plots of transcripts per cluster compared to the other two clusters in the end-stage DCM patients. Adjusted p-value <0.05 is plotted as a cutoff to distinguish transcripts. **(B)** The top5 most significant differentially expressed up- and down-regulated cluster marker genes, among genes with adjusted p-value < 0.05 , |FC| >1.5 and mean reads > 400 in the higher expressed part.

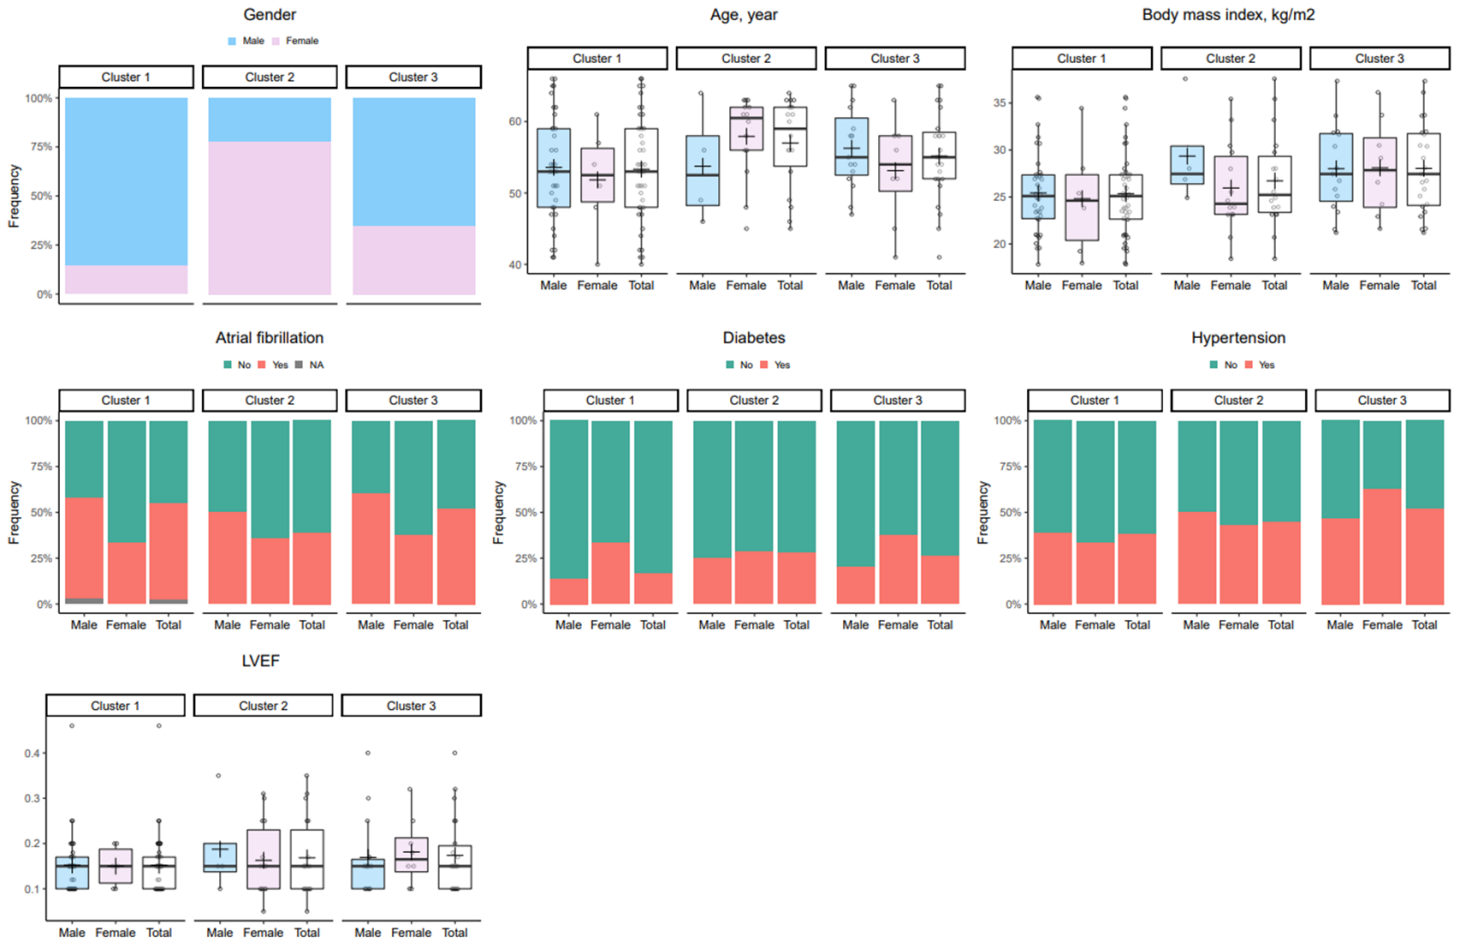

**Supplemental Figure 9. Association between phenotype and clusters based on cardiac transcriptome in end-stage DCM patients.** Details of all available variables by grouped bar plot, or violin plot + box plot for categorical variables and quantitative variables, respectively.

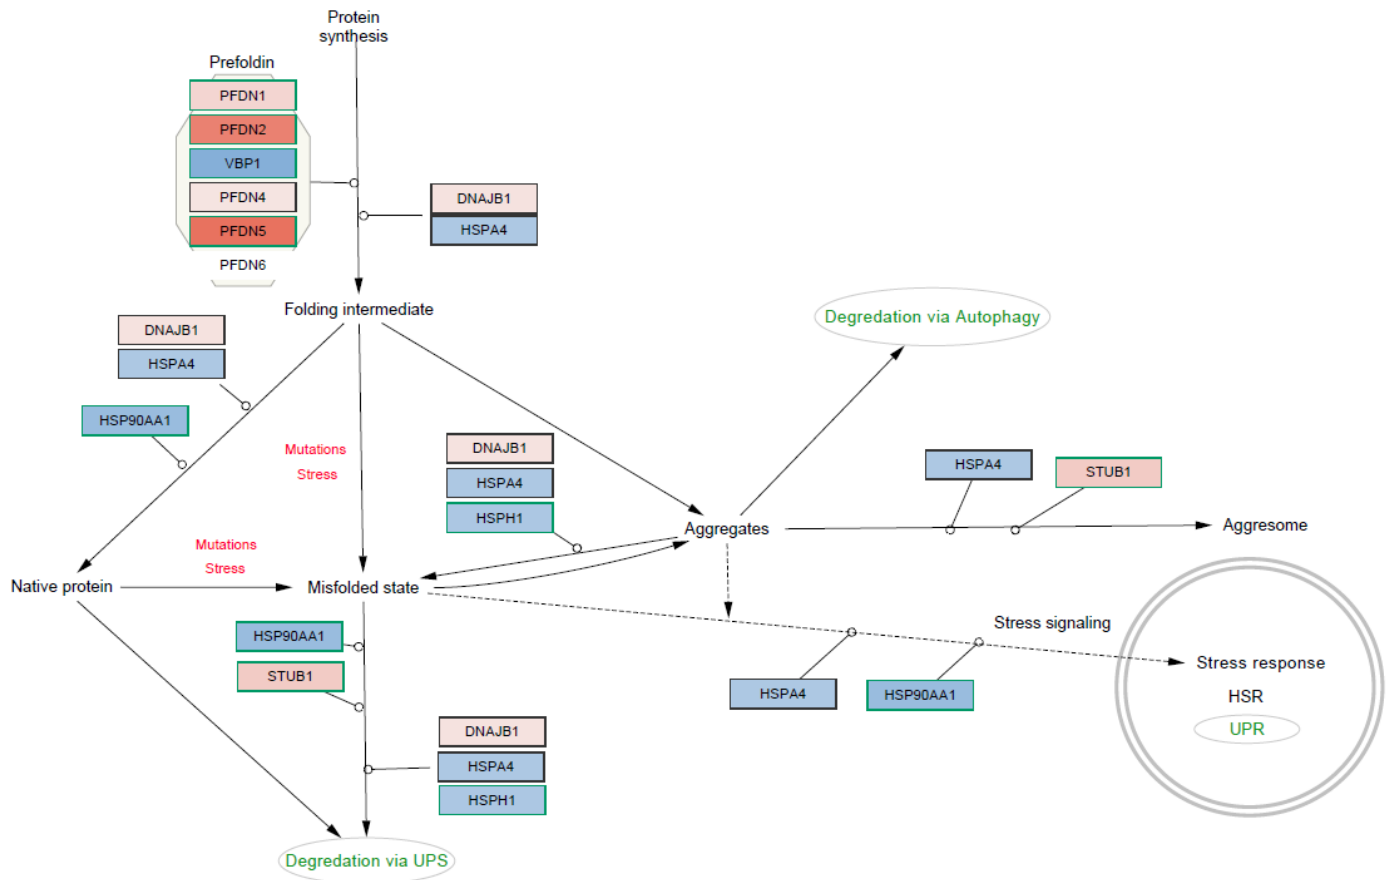

**Supplemental Figure 10. Transcriptomic expression of the pathways involved in proteostasis in patients from cluster 1.** Blue indicates a down-regulation of a gene, red indicates upregulation of a gene. The border of the Gene name, green: adjusted p-value <0.05; black: adjusted p-value >0.05; light grey: not expressed.

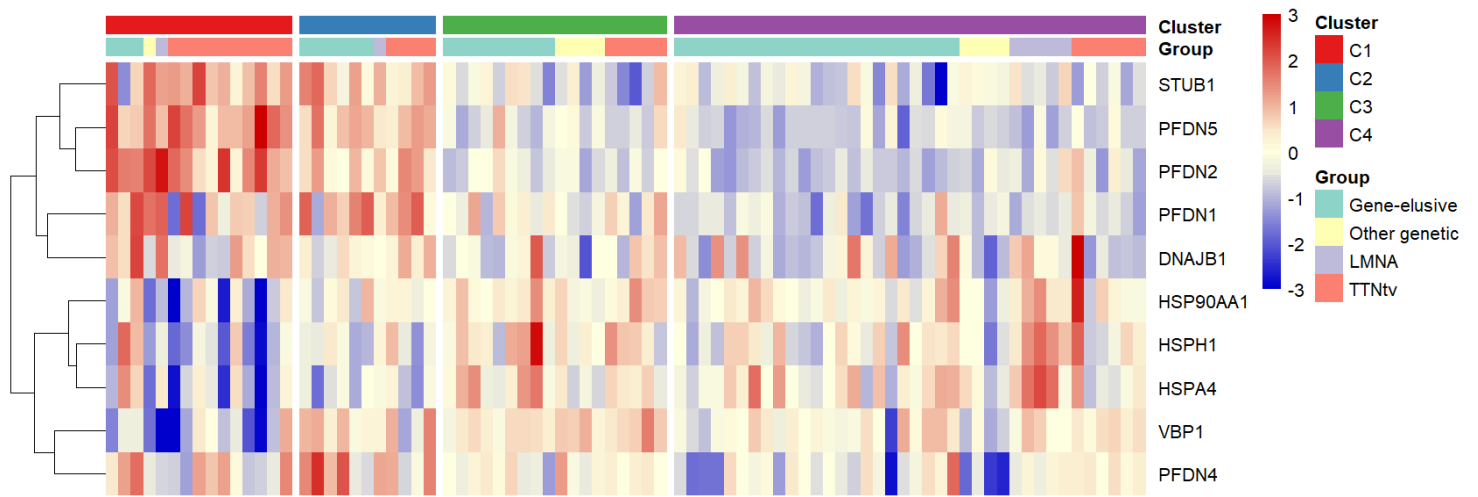

**Supplemental Figure 11. Heatmap genes involved in proteostasis pathways divided per cluster and genotype.**
